# Supplementary material for: Towards understanding of laccase-catalysed oxidative oligomerisation of dimeric lignin model compounds
Source: Royal Society of Chemistry journal article supplement (doi:10.1039/c6ra26975c), 2017-01-01
Supplement: c6ra26975c1.pdf [file c6ra26975c1.pdf]

Supporting Information

**Towards understanding of laccase-catalysed oxidative oligomerisation of dimeric lignin model compounds**

**B. Ramalingam,<sup>\*a</sup> B. Sana,<sup>b</sup> J. Seayad<sup>a</sup> F. J. Ghadessy<sup>b</sup> and M. B. Sullivan<sup>c</sup>**

<sup>a</sup> *Institute of Chemical and Engineering Sciences, #07-01/02 Neuros, 8 Biomedical Grove, Singapore 138 665. Fax: 65 6464 2102; Tel: 65 6799 8529; E-mail: balamurugan\_ramalingam@ices.a-star.edu.sg*

<sup>b</sup> *p53 Laboratory, #06-04/05 Neuros/Immunos, 8A Biomedical Grove, Singapore 138 648.*

<sup>c</sup> *Institute of High Performance Computing, 1 Fusionopolis Way, #16-16 Connexis, Singapore 138632.*

## 1. General information

**Methods:** Analytical thin layer chromatography (TLC) separations were performed on Merck's silica gel 60 F<sub>254</sub>-precoated aluminum sheets. Visualization was accomplished with UV light and/or aqueous potassium permanganate solution (0.1 N) stain.

<sup>1</sup>H and <sup>13</sup>C nuclear magnetic resonance (NMR) spectra were obtained using a Bruker 400 UltraShield Spectrometer operating at 400 MHz and 100 MHz respectively. Chemical shifts for <sup>1</sup>H NMR were recorded in parts per million (ppm) downfield from proton signal of residual non-deuterated solvent ( $\delta$  7.26 ppm for CDCl<sub>3</sub> and 2.05 ppm for Acetone-D<sub>6</sub>) as the internal signal. Coupling constants are indicated in Hertz (Hz). For <sup>13</sup>C NMR spectra, chemical shifts are reported relative to the central line of the triplet at  $\delta$  77.2 ppm and 206.3 ppm resonance respectively for non-deuterated residuals originated from CDCl<sub>3</sub> and acetone-D<sub>6</sub>. The following abbreviations are used for spin multiplicity: s=singlet, d=doublet, t=triplet, q=quartet, m=multiplet and br=broad.

HPLC analysis on the reaction progress and quantification of unreacted HPLC analysis was performed on Agilent 1200 series. HPLC-MS was performed on Agilent 1260 infinity equipped with Agilent 6120 quadrupole LC/MS system. Phenomenex C12 column (Jupiter 4 $\mu$ m Proteo 90 Å, LC Column 150 x 4.60 mm) was used for the HPLC analysis. Trifluoroacetic acid (1%) in water and Trifluoroacetic acid (1%) in acetonitrile were used as mobile phase under the gradient flow (30 min) starting from 90% H<sub>2</sub>O to 30% H<sub>2</sub>O. 0.5 mL/min flow, 25 °C, 280 nm. Mass spectrometry was run by the electrospray ionization time-of-flight (ESI-TOF) mode on an Agilent 6210 mass spectrometer.

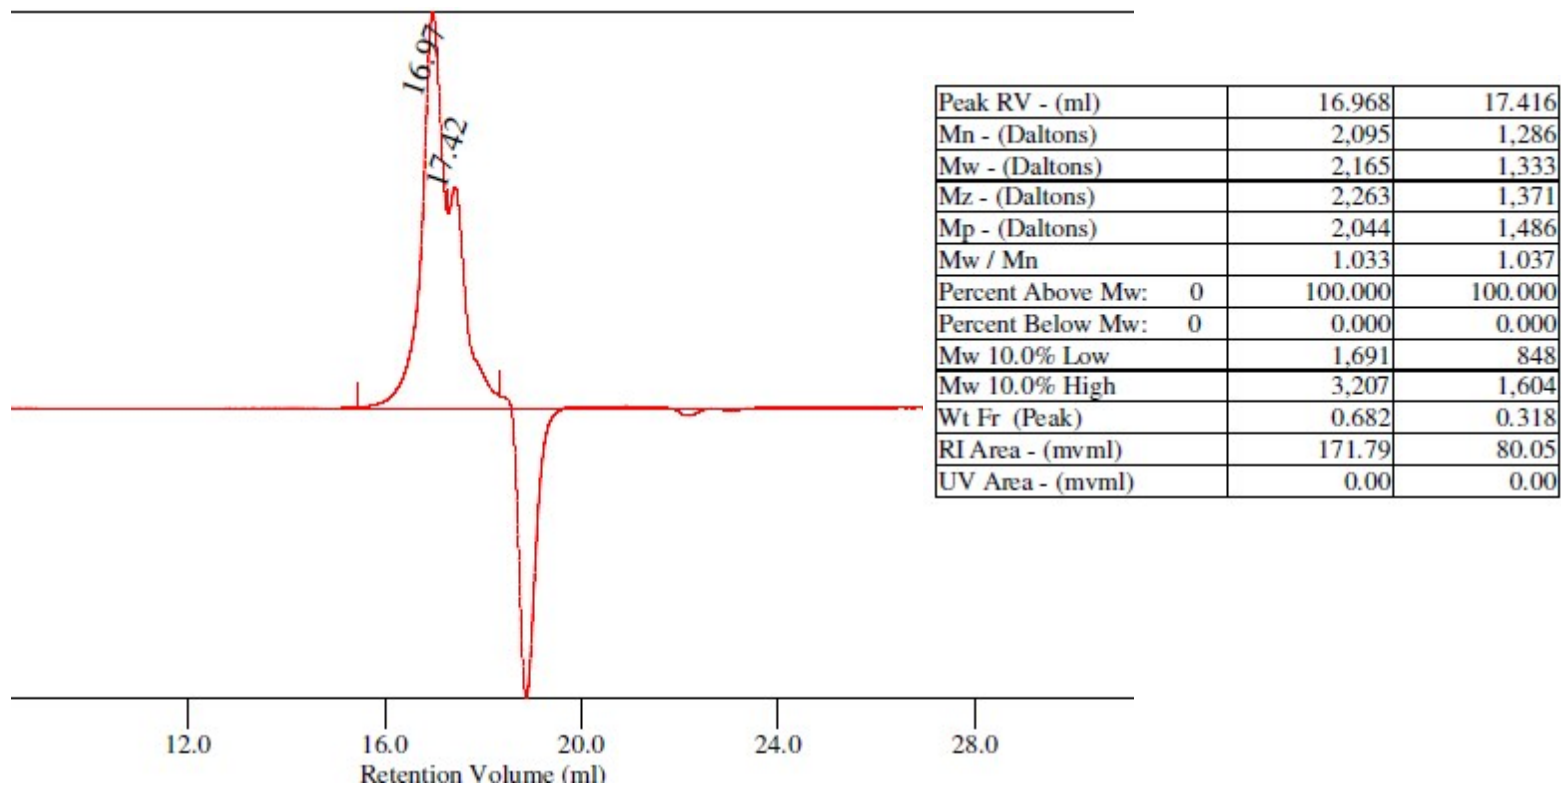

**Fig. S1.** GPC of oligomers that was obtained upon treatment of POL with **1**. PMMA (Poly(methyl methacrylate)) was used for calibration.

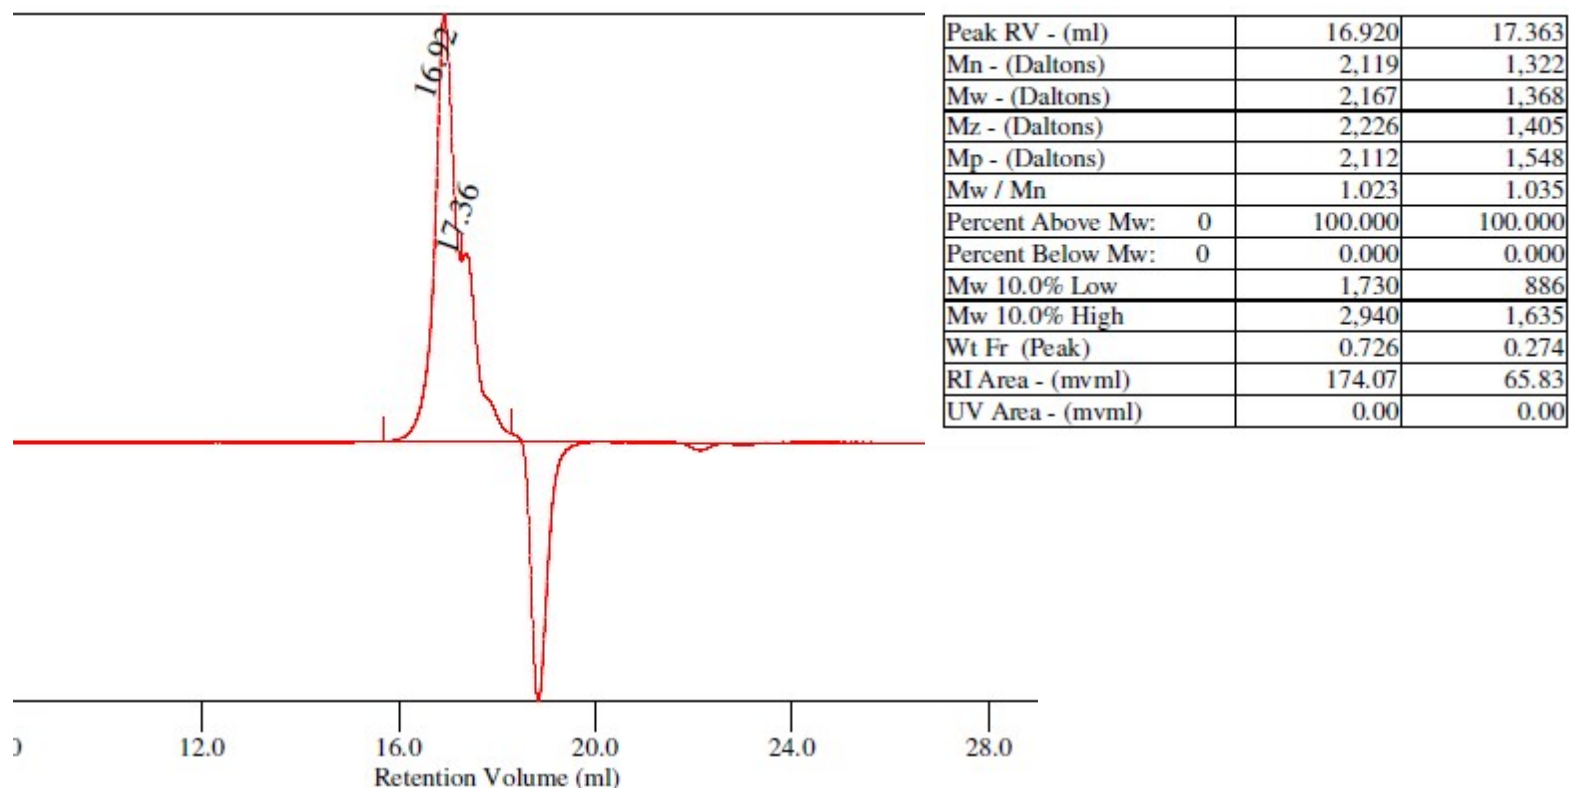

**Fig. S2.** GPC of oligomers that was obtained upon treatment of TVL (2 units/mL) with **1**. PMMA (Poly(methyl methacrylate)) was used for calibration.

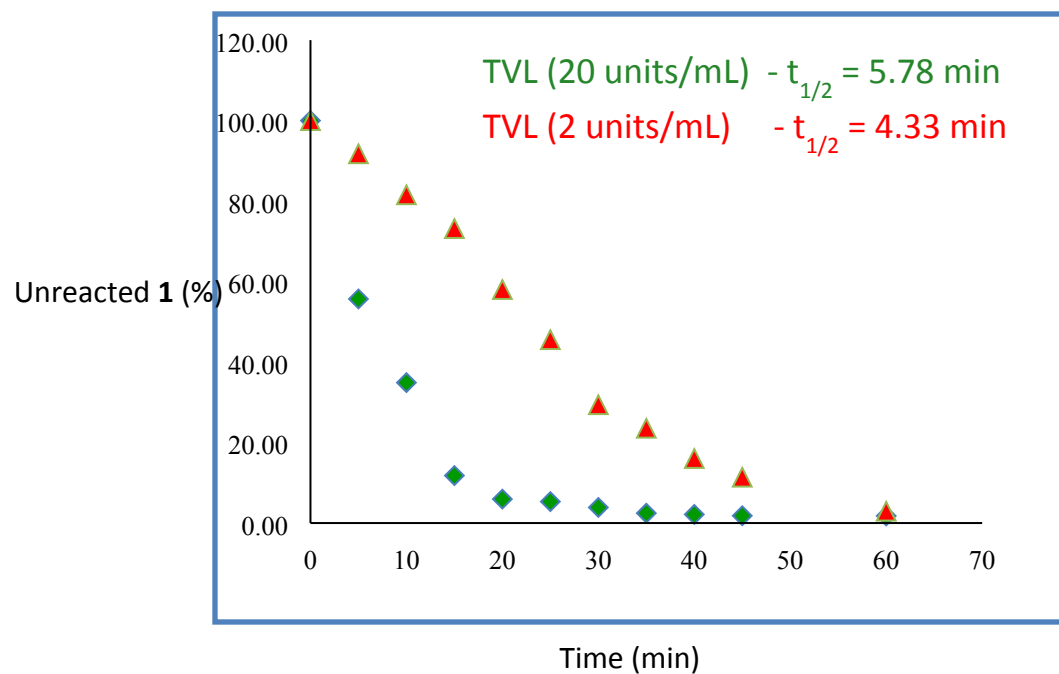

**Fig. S3.** Comparison of initial reactivity of TVL with **1** at two different concentrations.

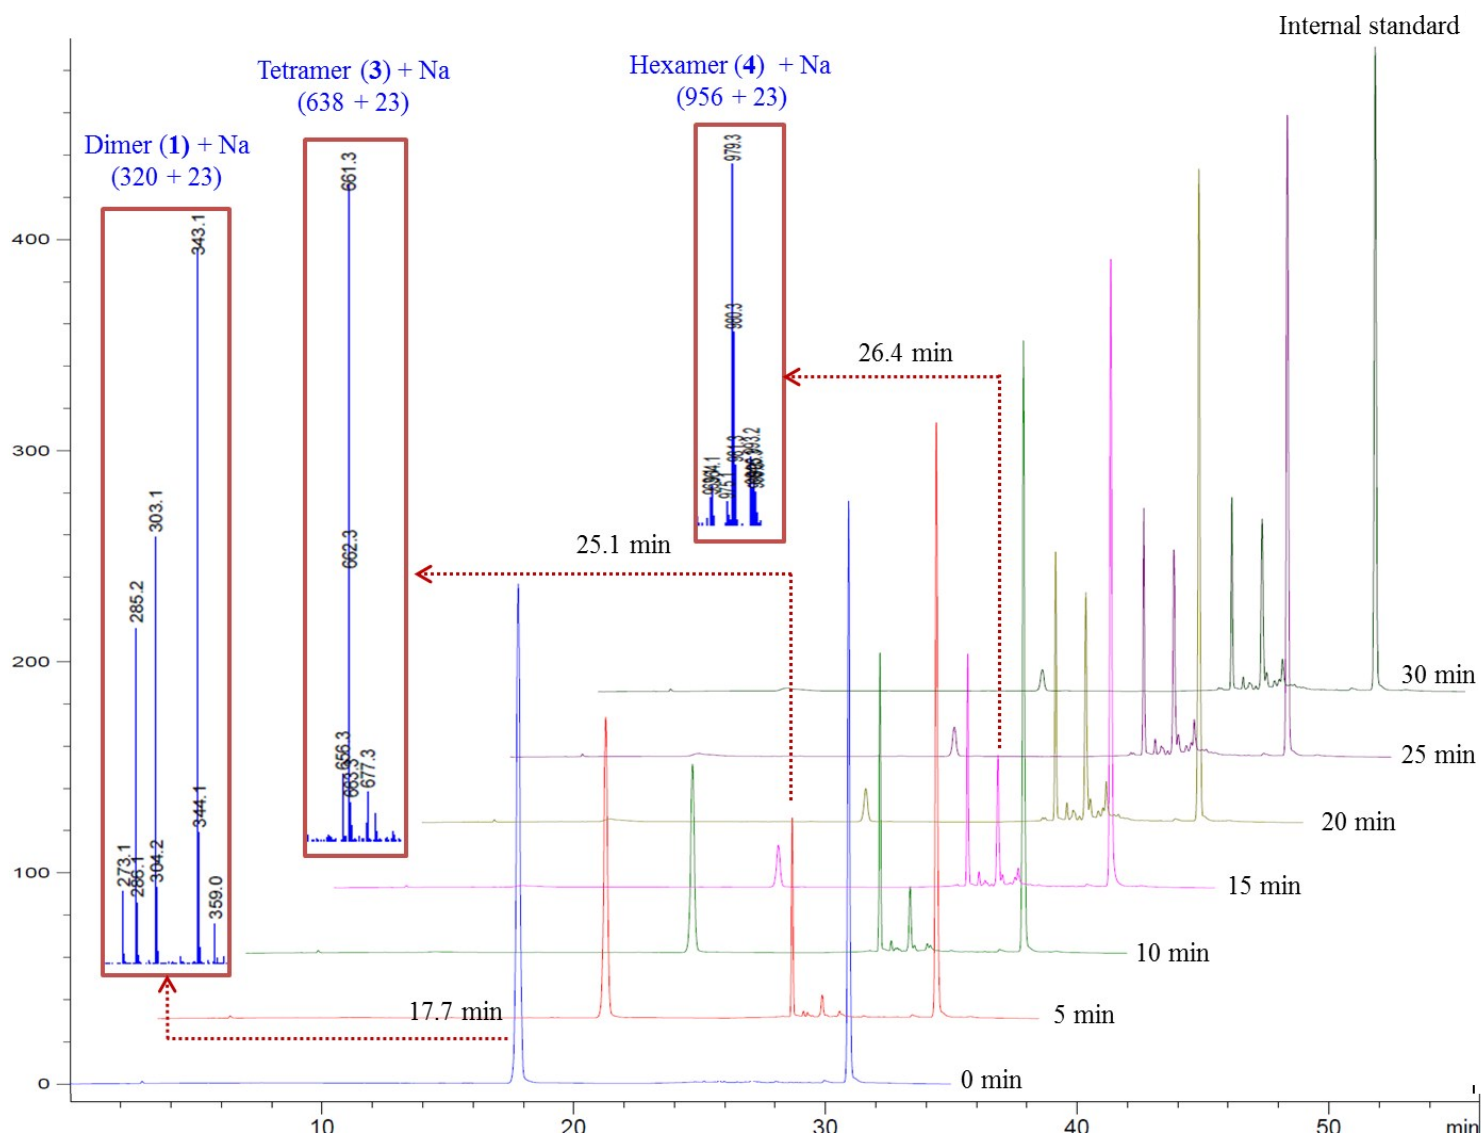

**Fig. S4.** LC-MS traces of laccase-catalysed oxidation of **1** at regular time intervals. 9-Acetylphenanthrene was used as an internal standard for quantification.

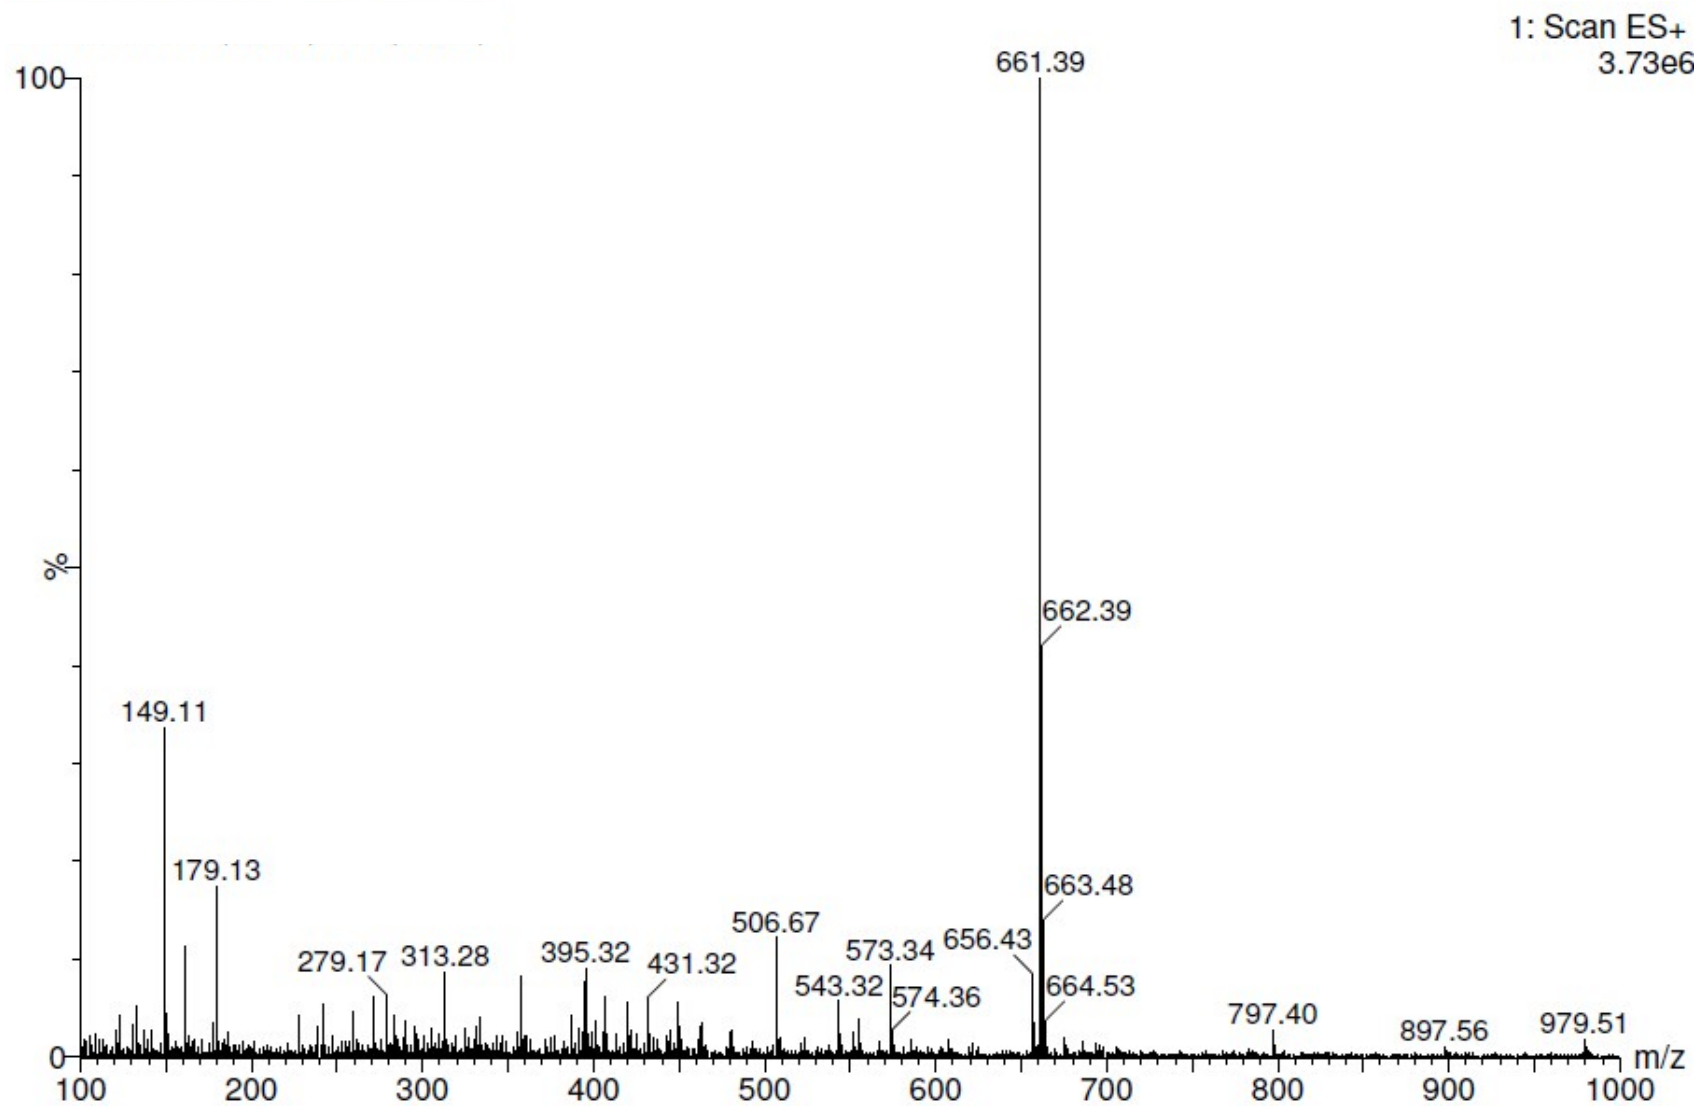

Fig. S5. ES-Mass spectrum of the tetramer (**3**) major product (retention time – 25.2 min).

MS Spectrum

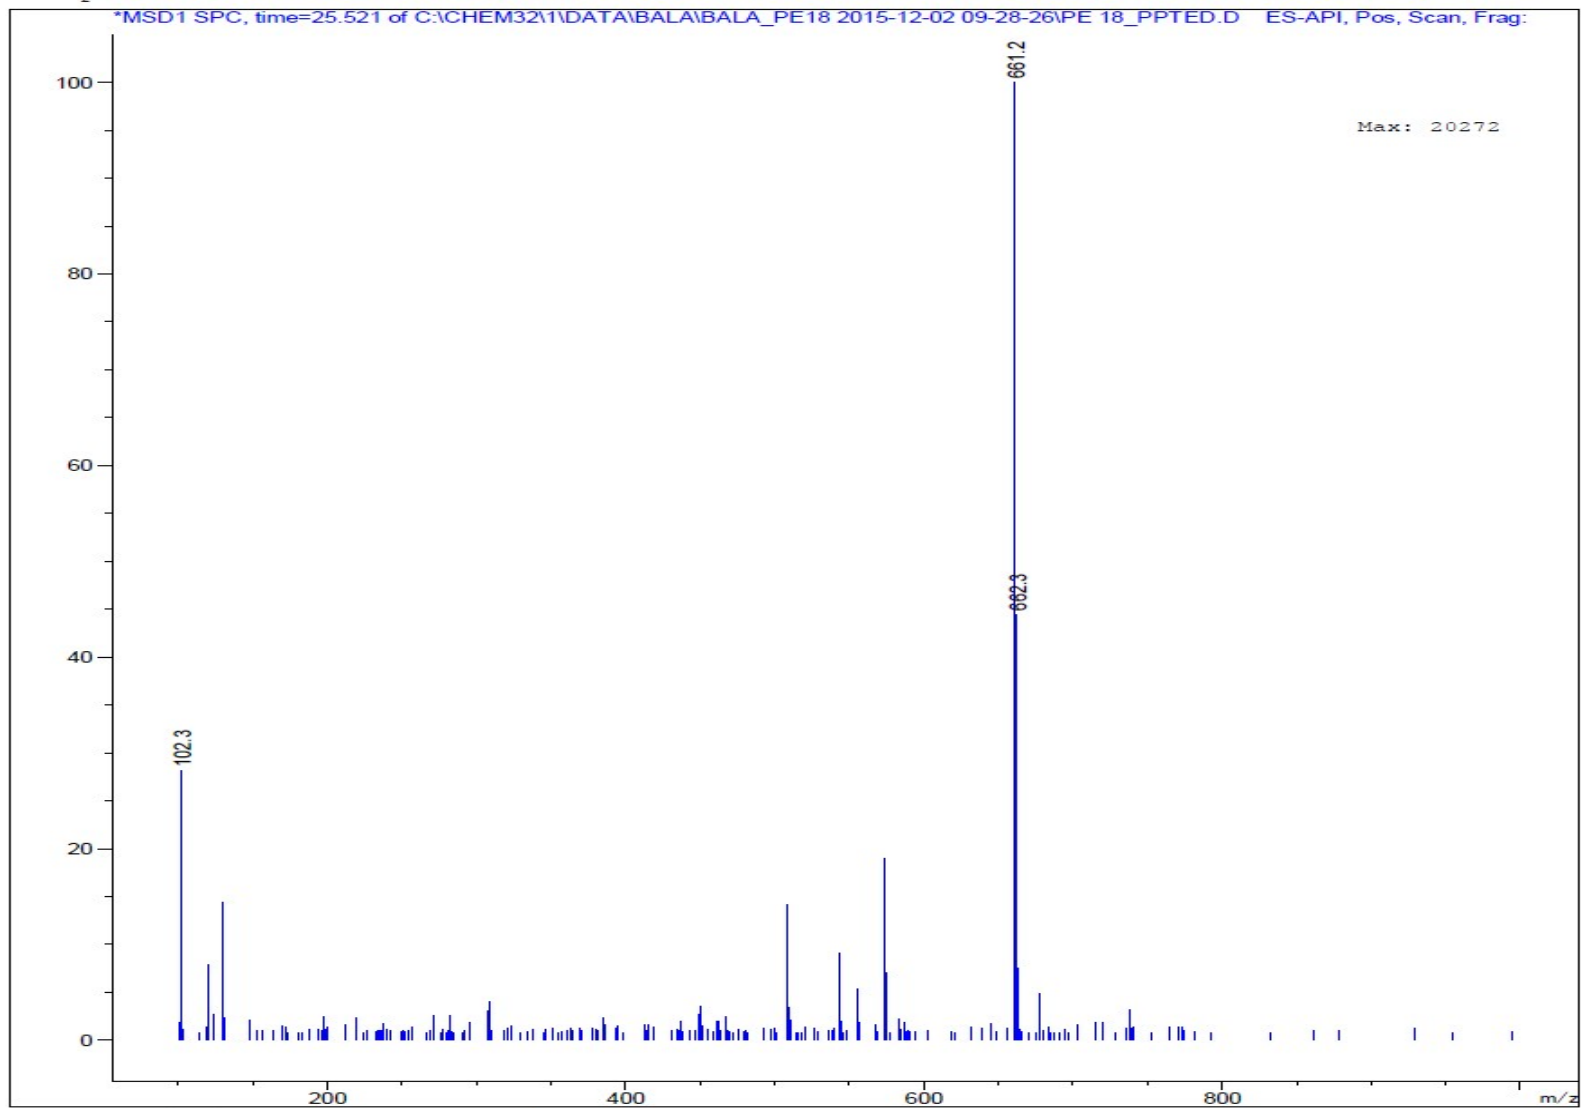

**Fig. S6.** ES-Mass spectrum of the tetramer (**3**) minor product (retention time – 25.6 min).



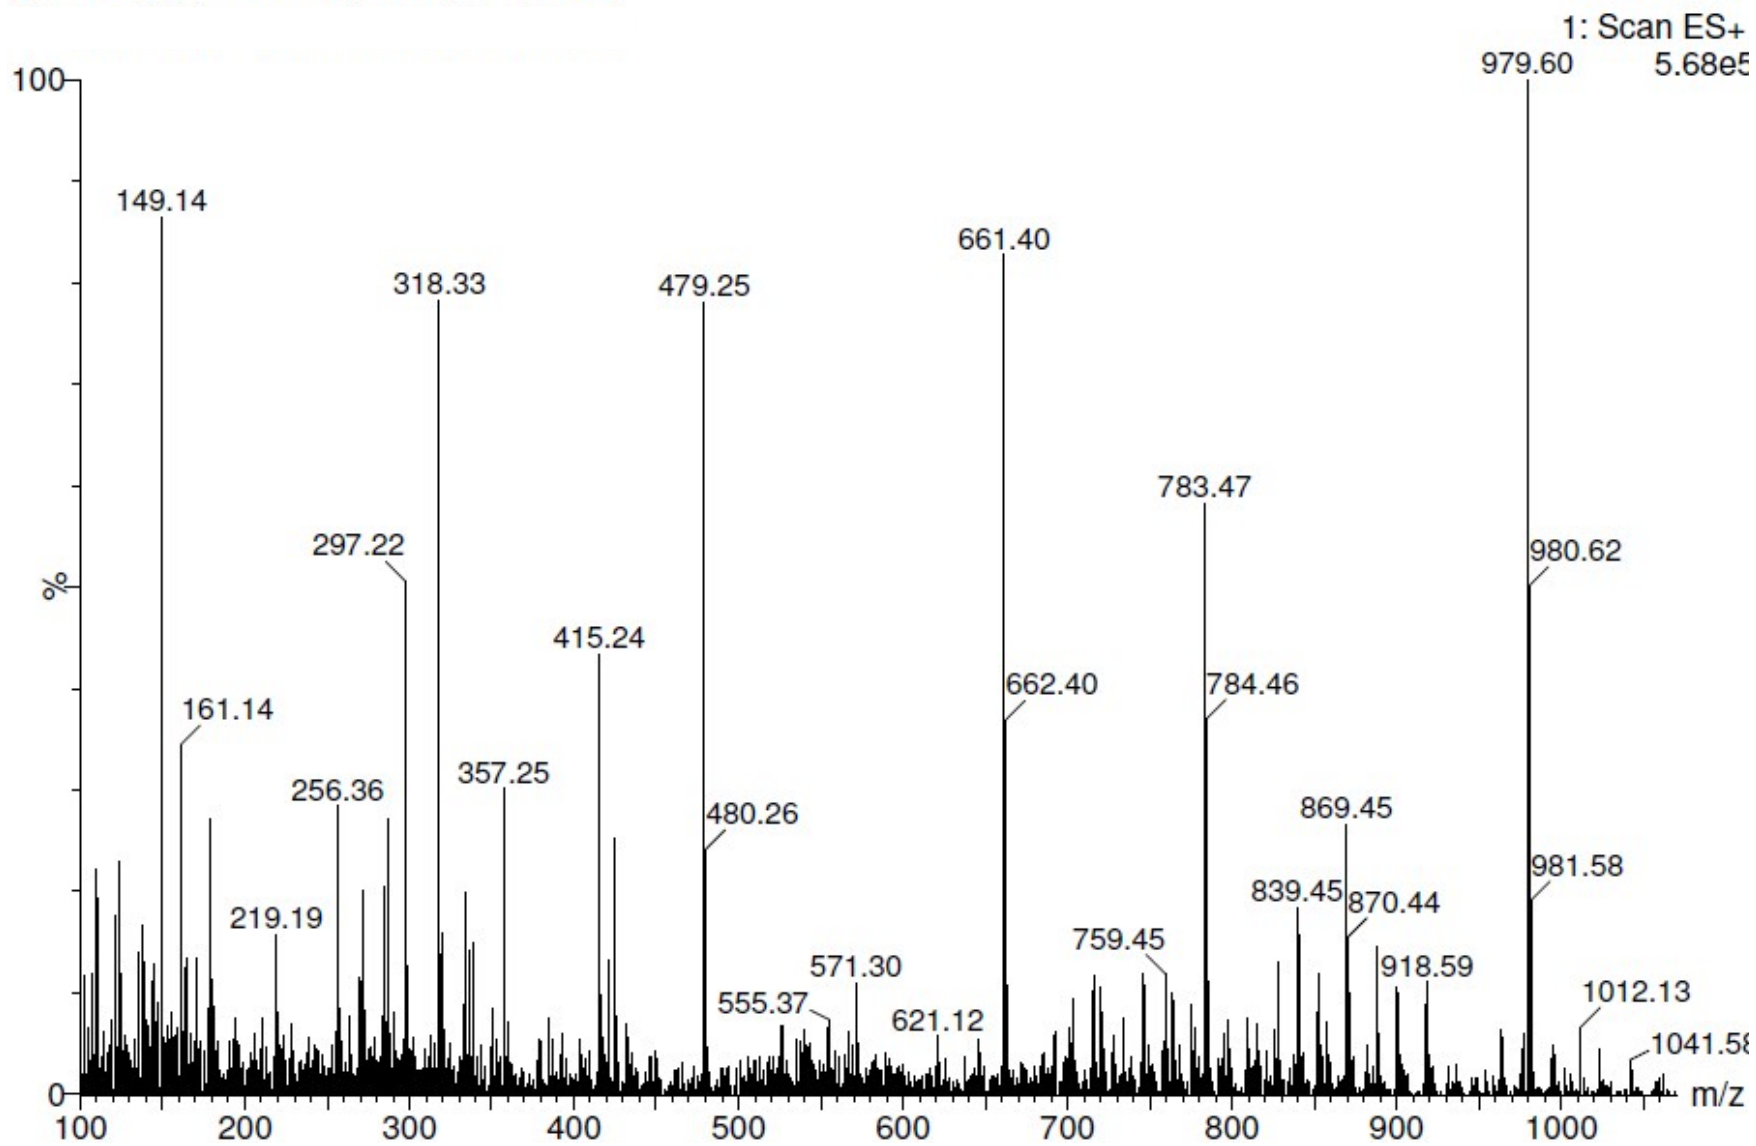

Fig. S7. ES-Mass spectrum of the hexamer (4) major product (retention time – 26.4 min).

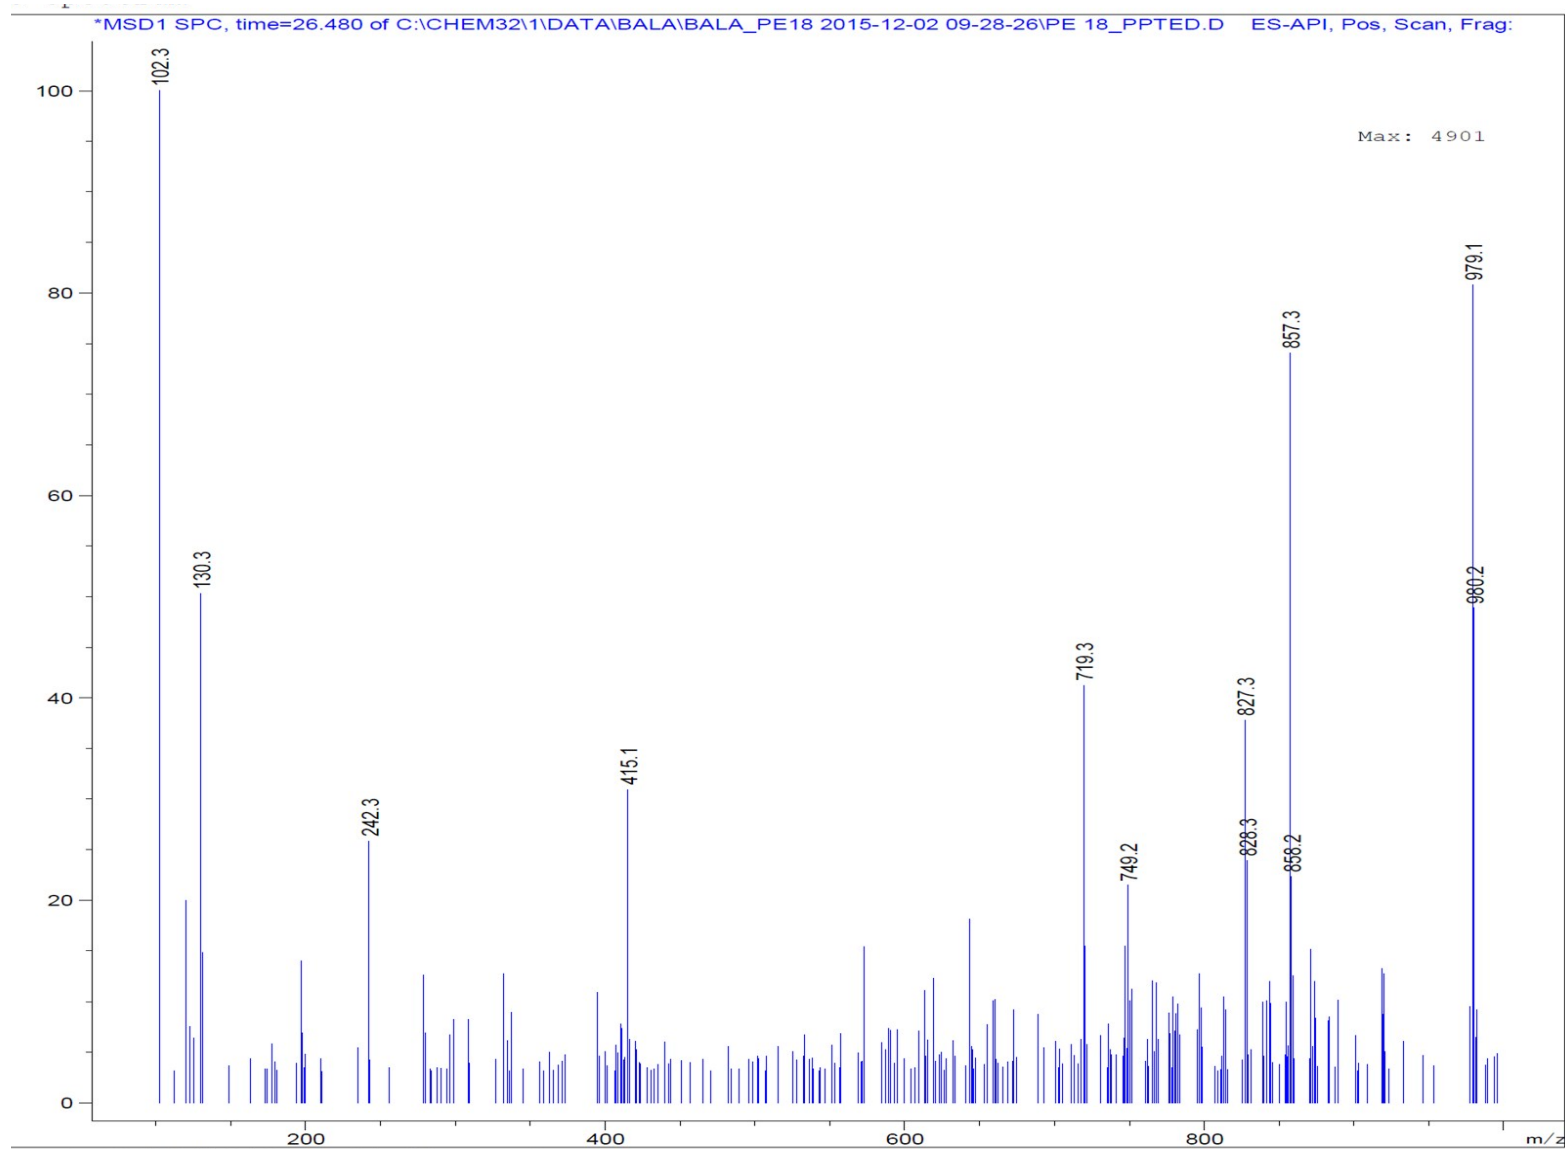

**Fig. S8.** ES-Mass spectrum of the hexamer (4) minor product (retention time – 27.2 min).

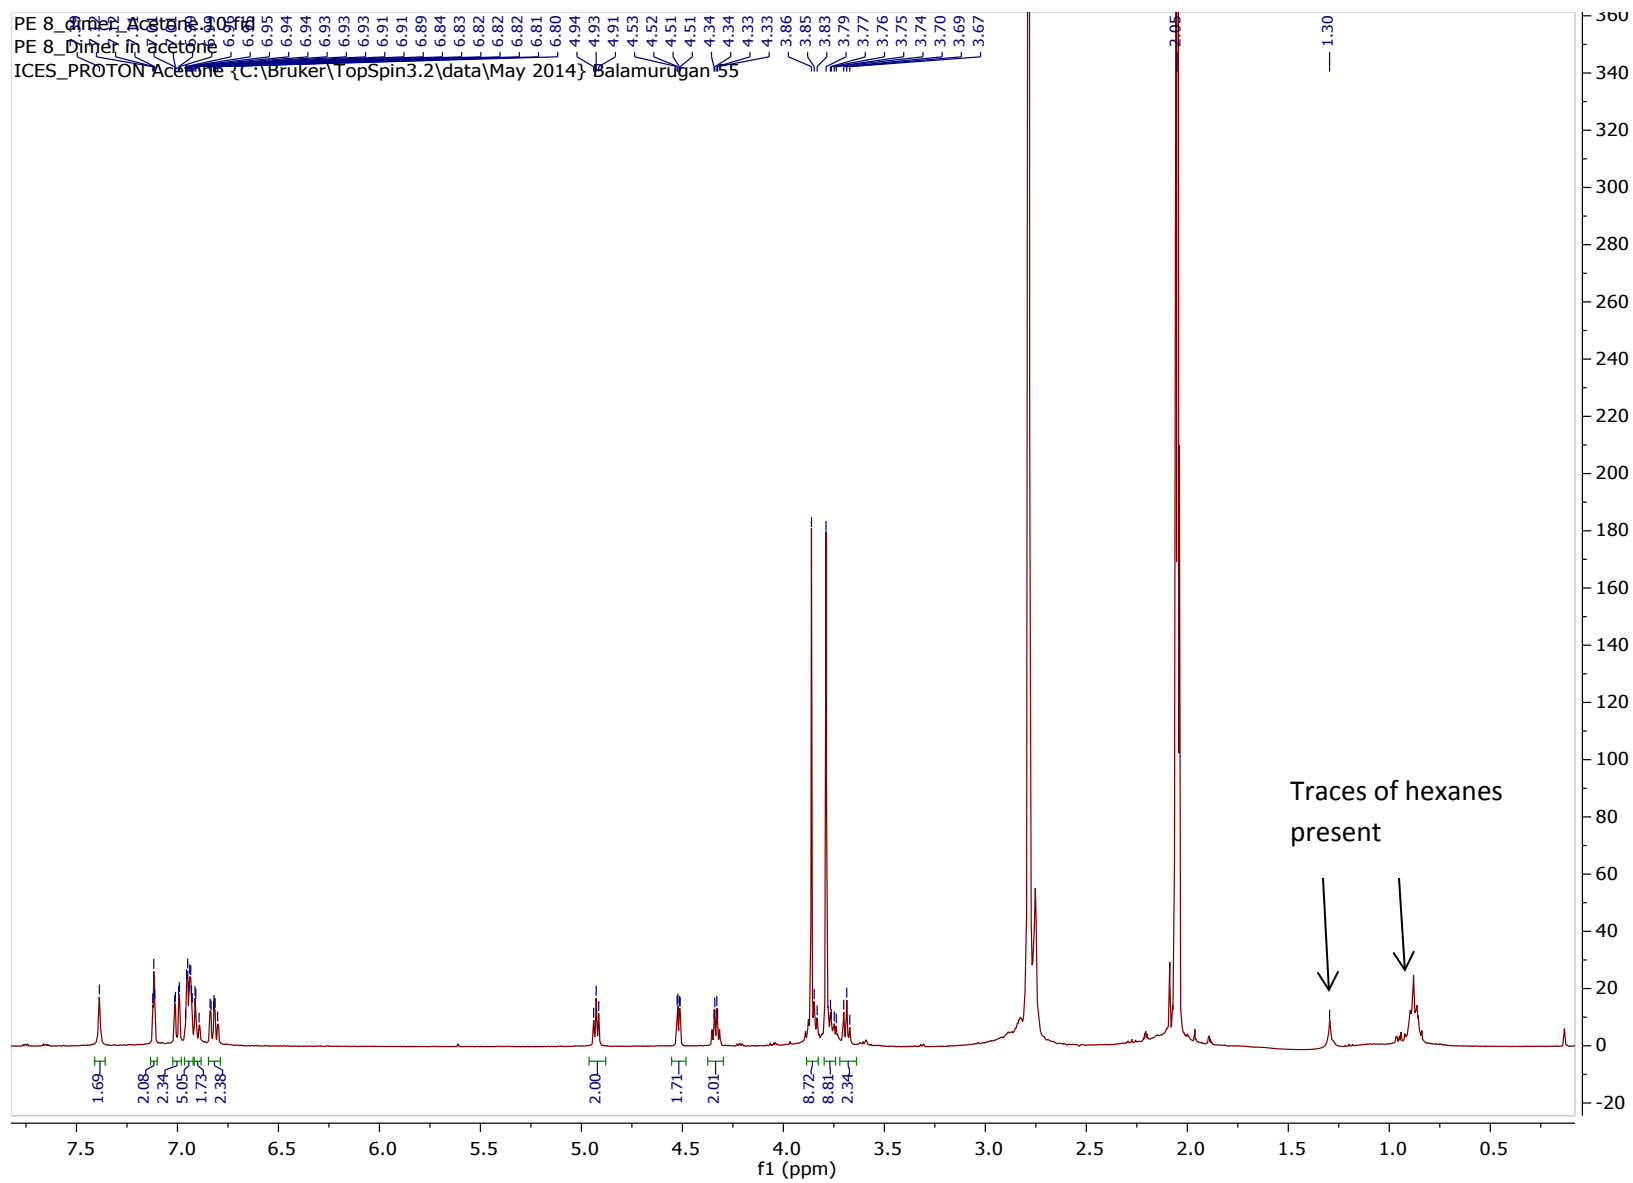

Fig. S9.  $^1\text{H}$  NMR spectrum of **3B**.

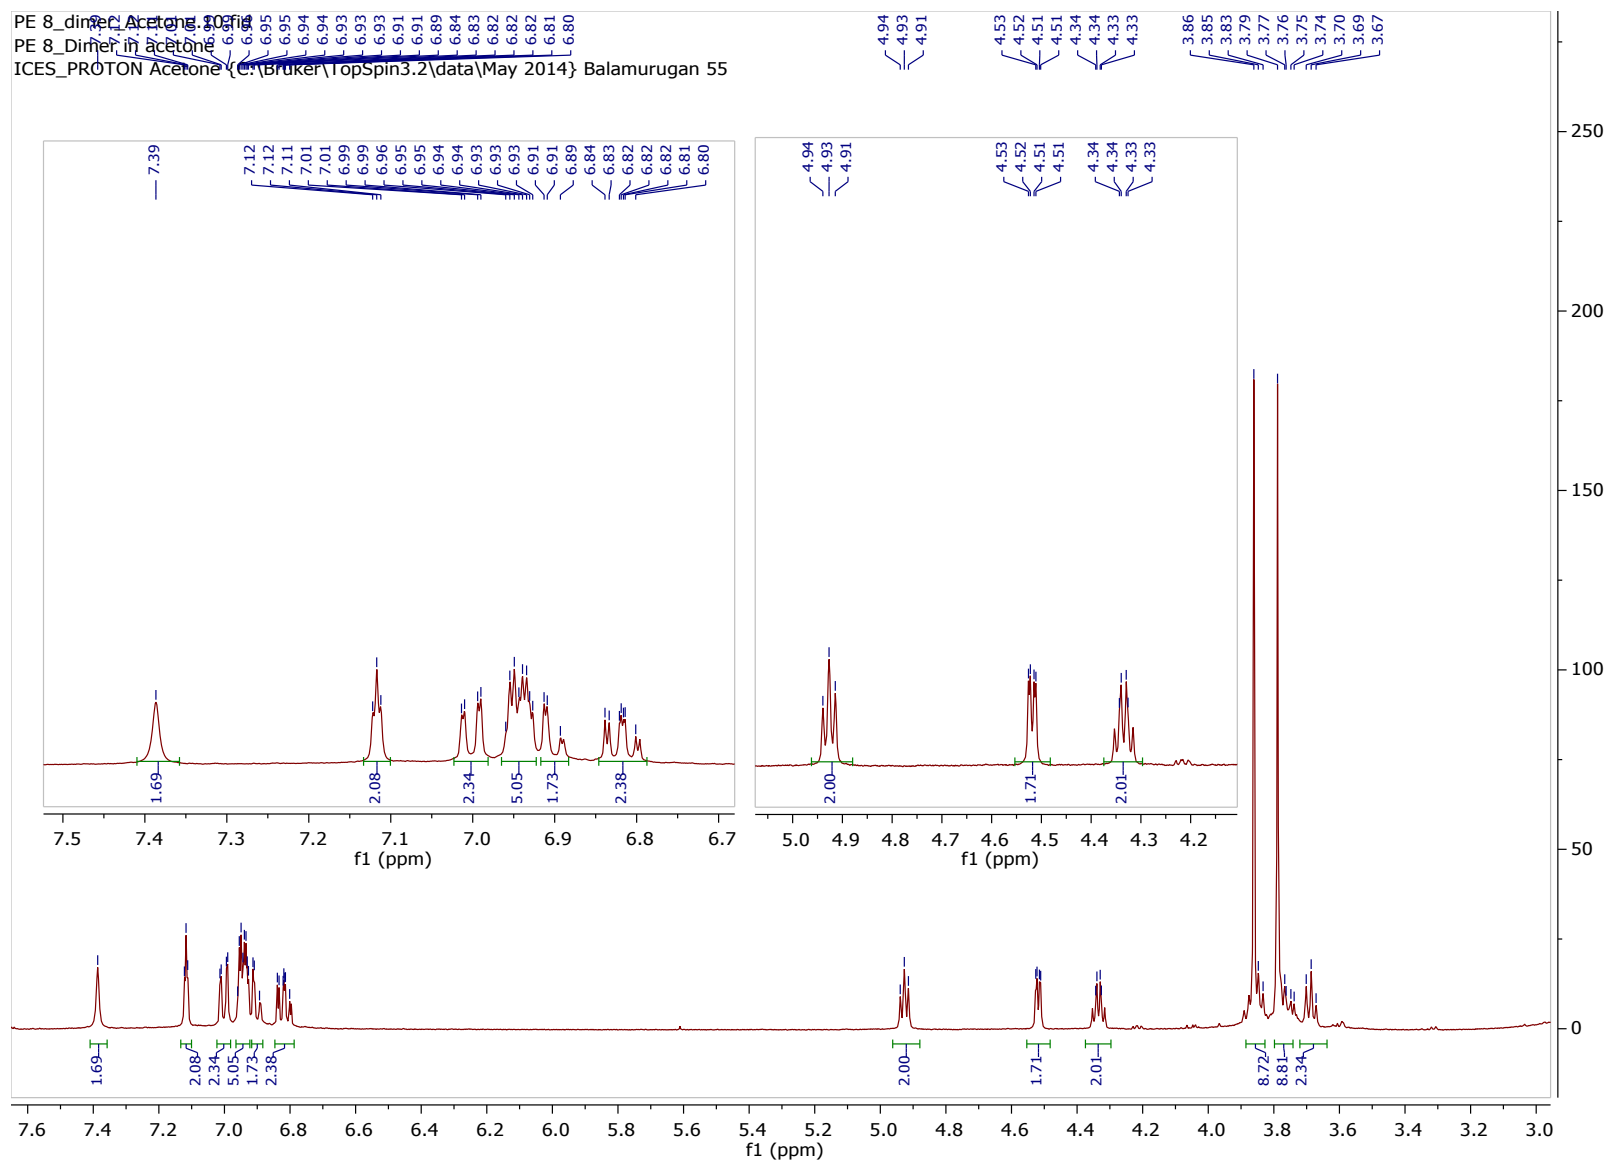

**Fig. S9a.**  $^1\text{H}$  NMR spectrum of **3B**. Expanded inserts for aliphatic and aromatic region was provided for better clarity.

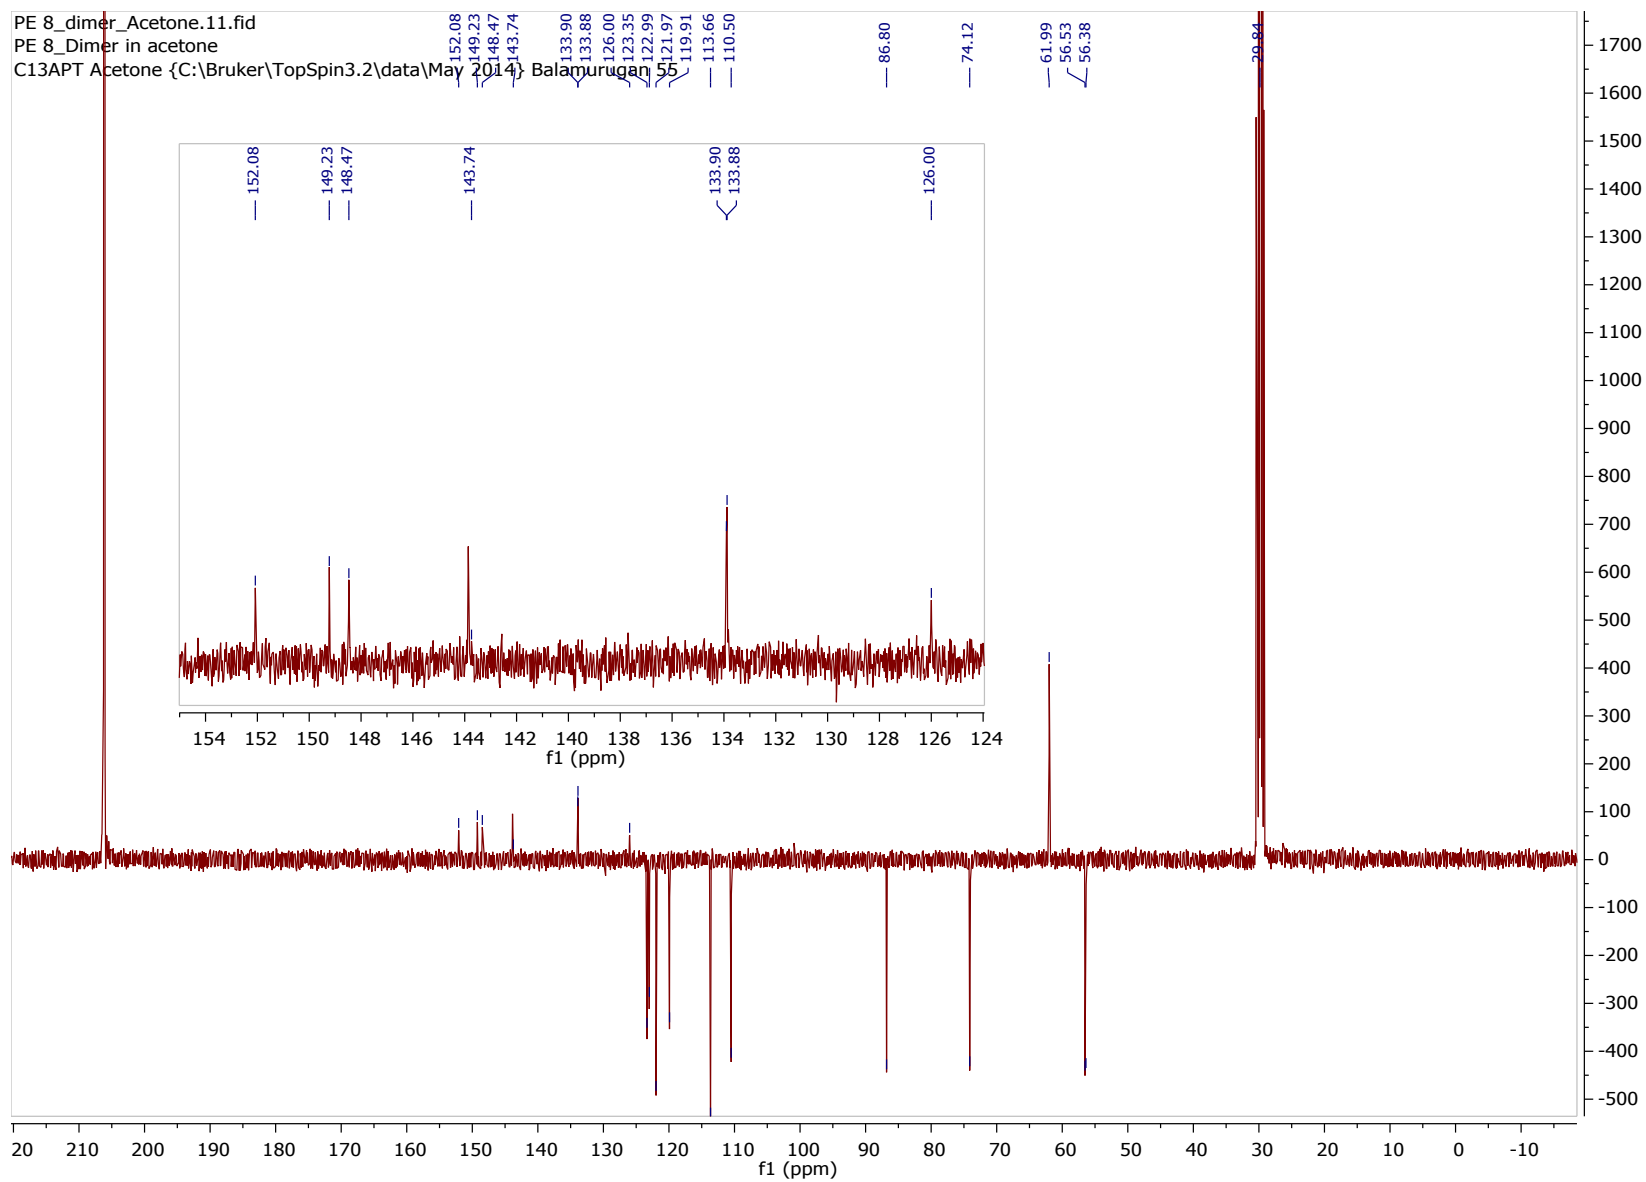

**Fig. S10.**  $^{13}\text{C}$  NMR (APT) spectrum of **3B**.

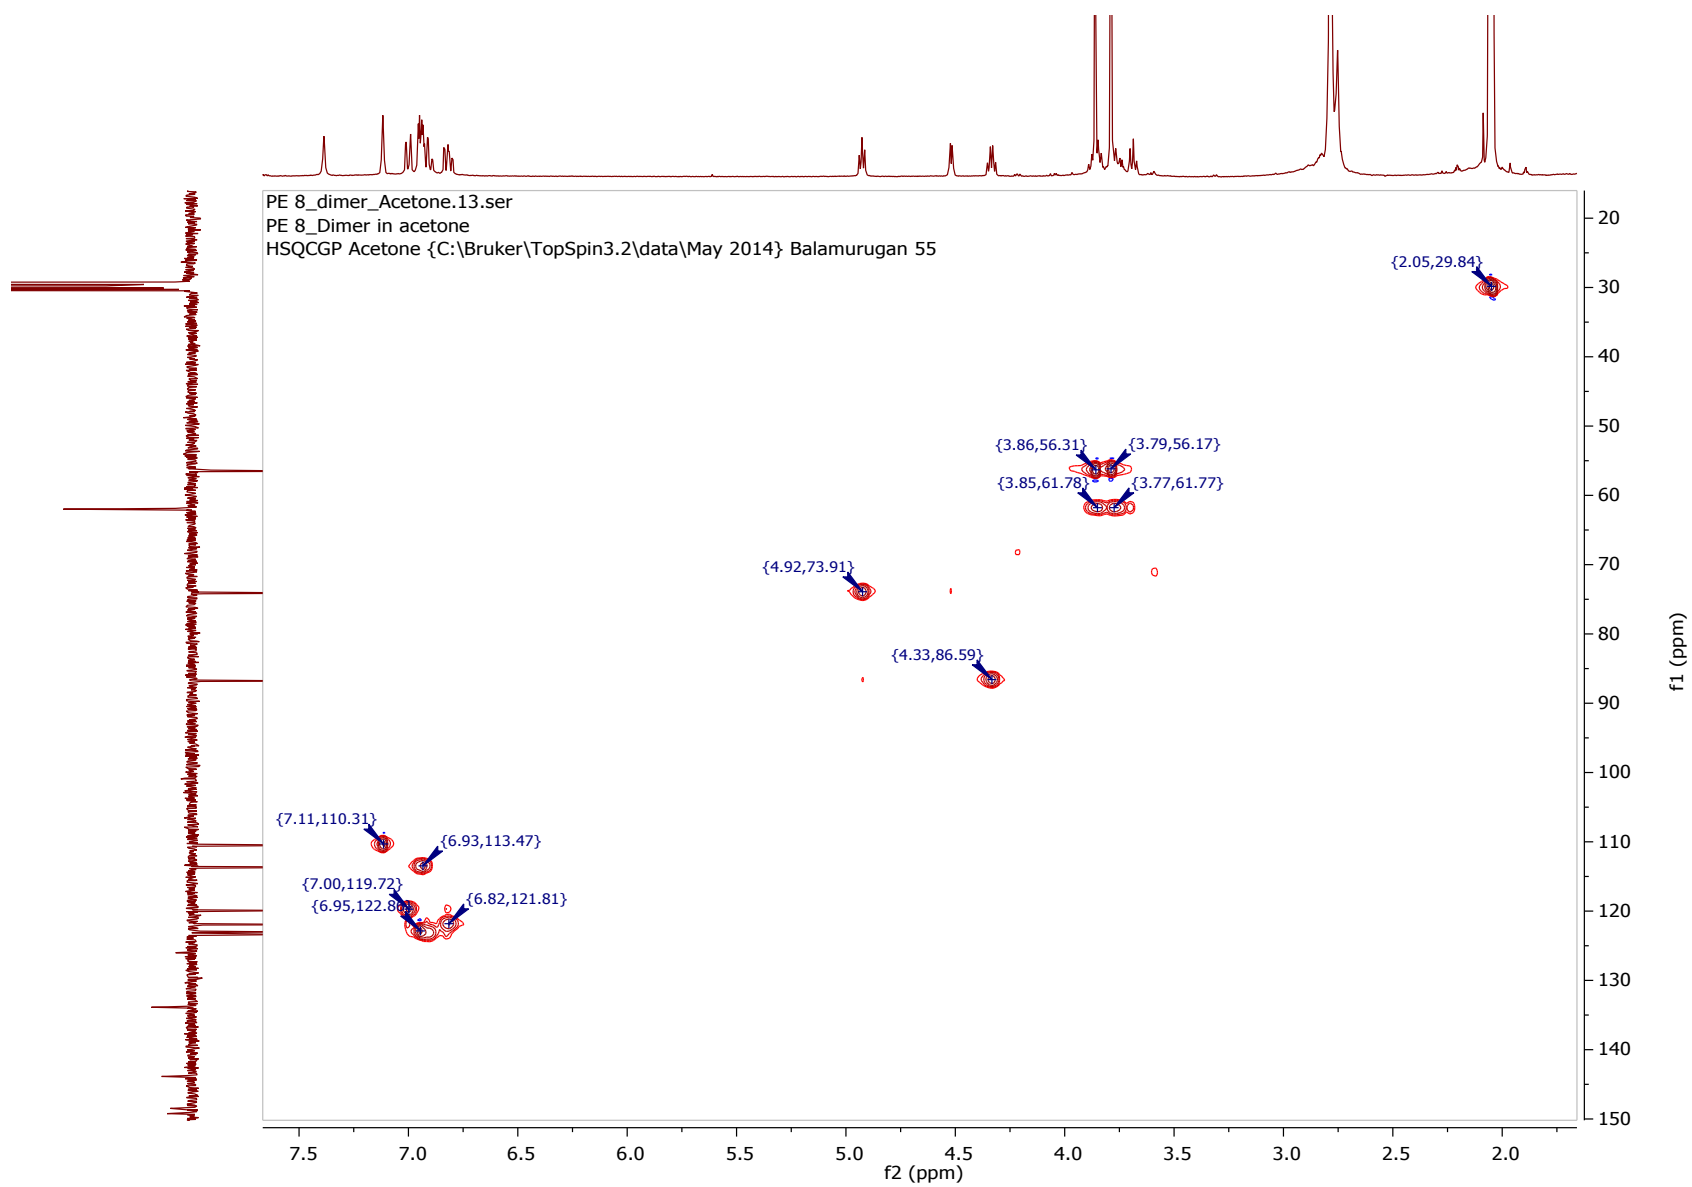

Fig. S11. HSQC NMR spectrum of **3B**.

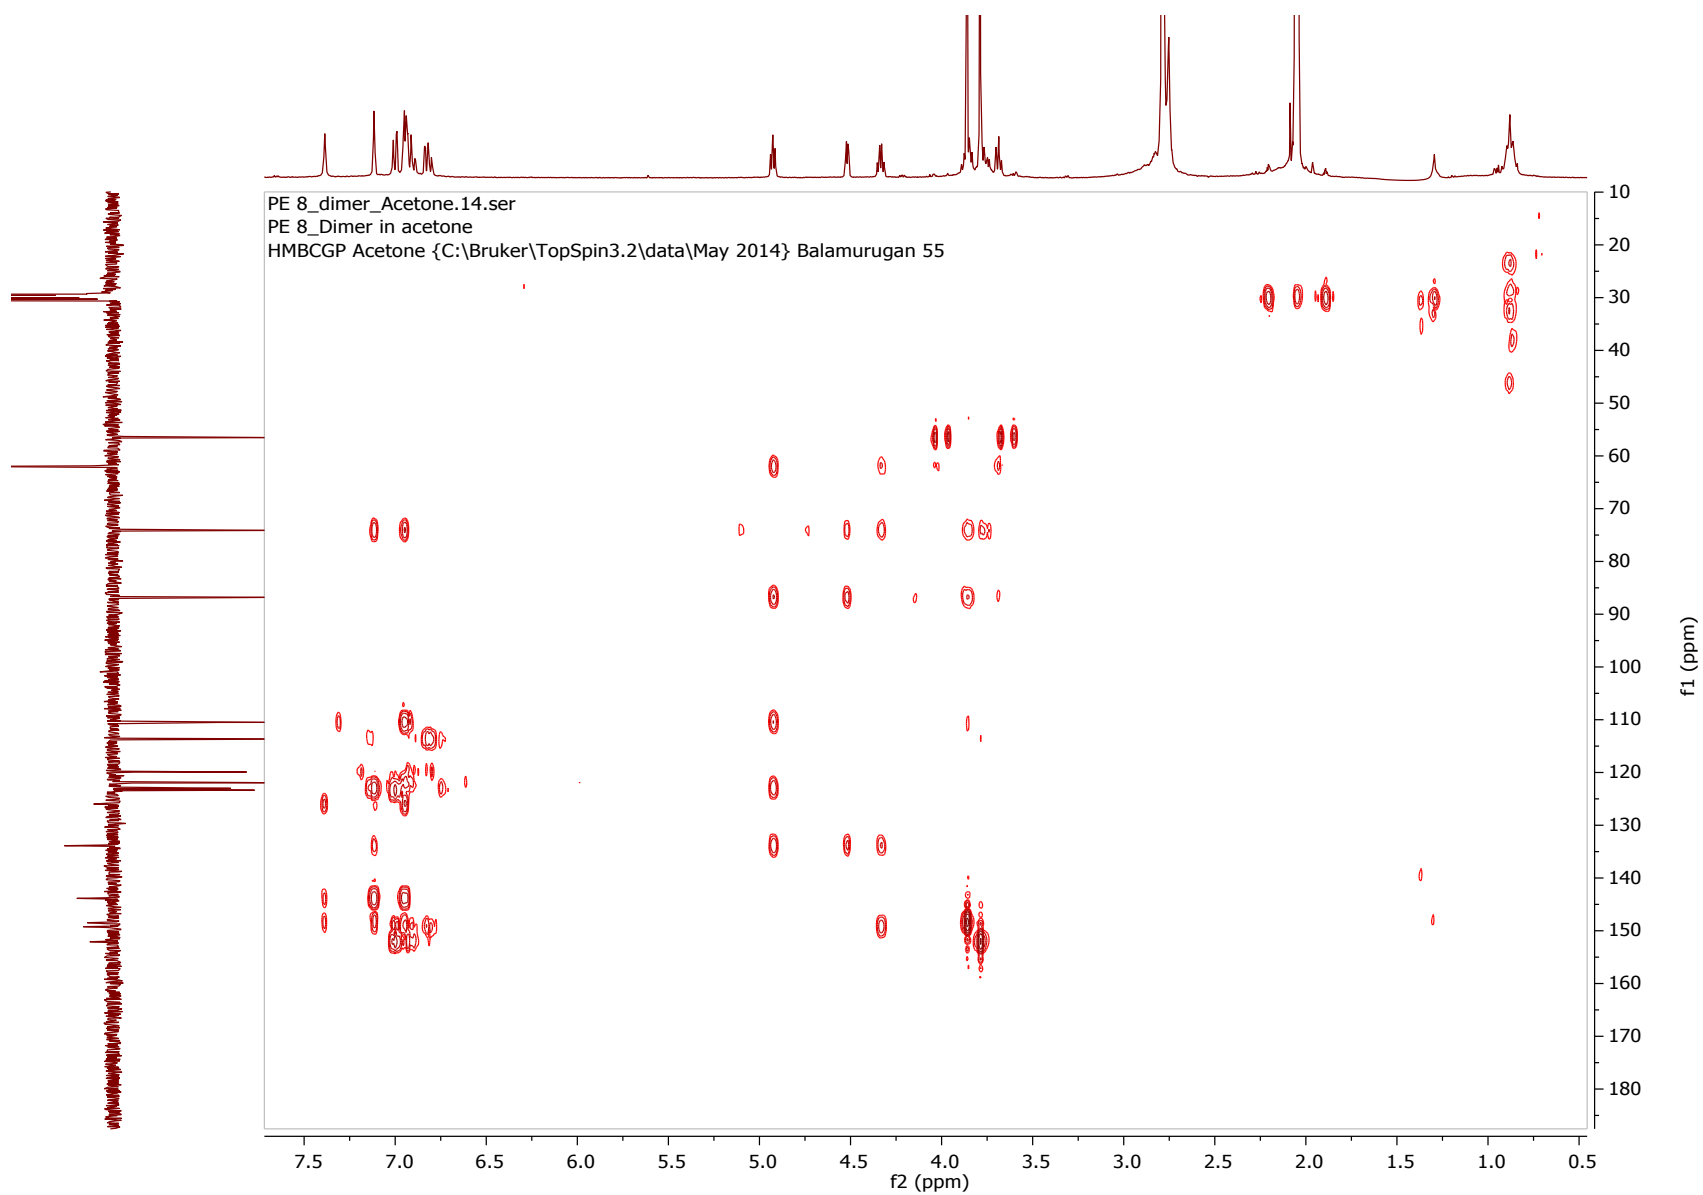

Fig. S12. HMBC NMR spectrum of **3B**. Peaks are omitted for clarity.

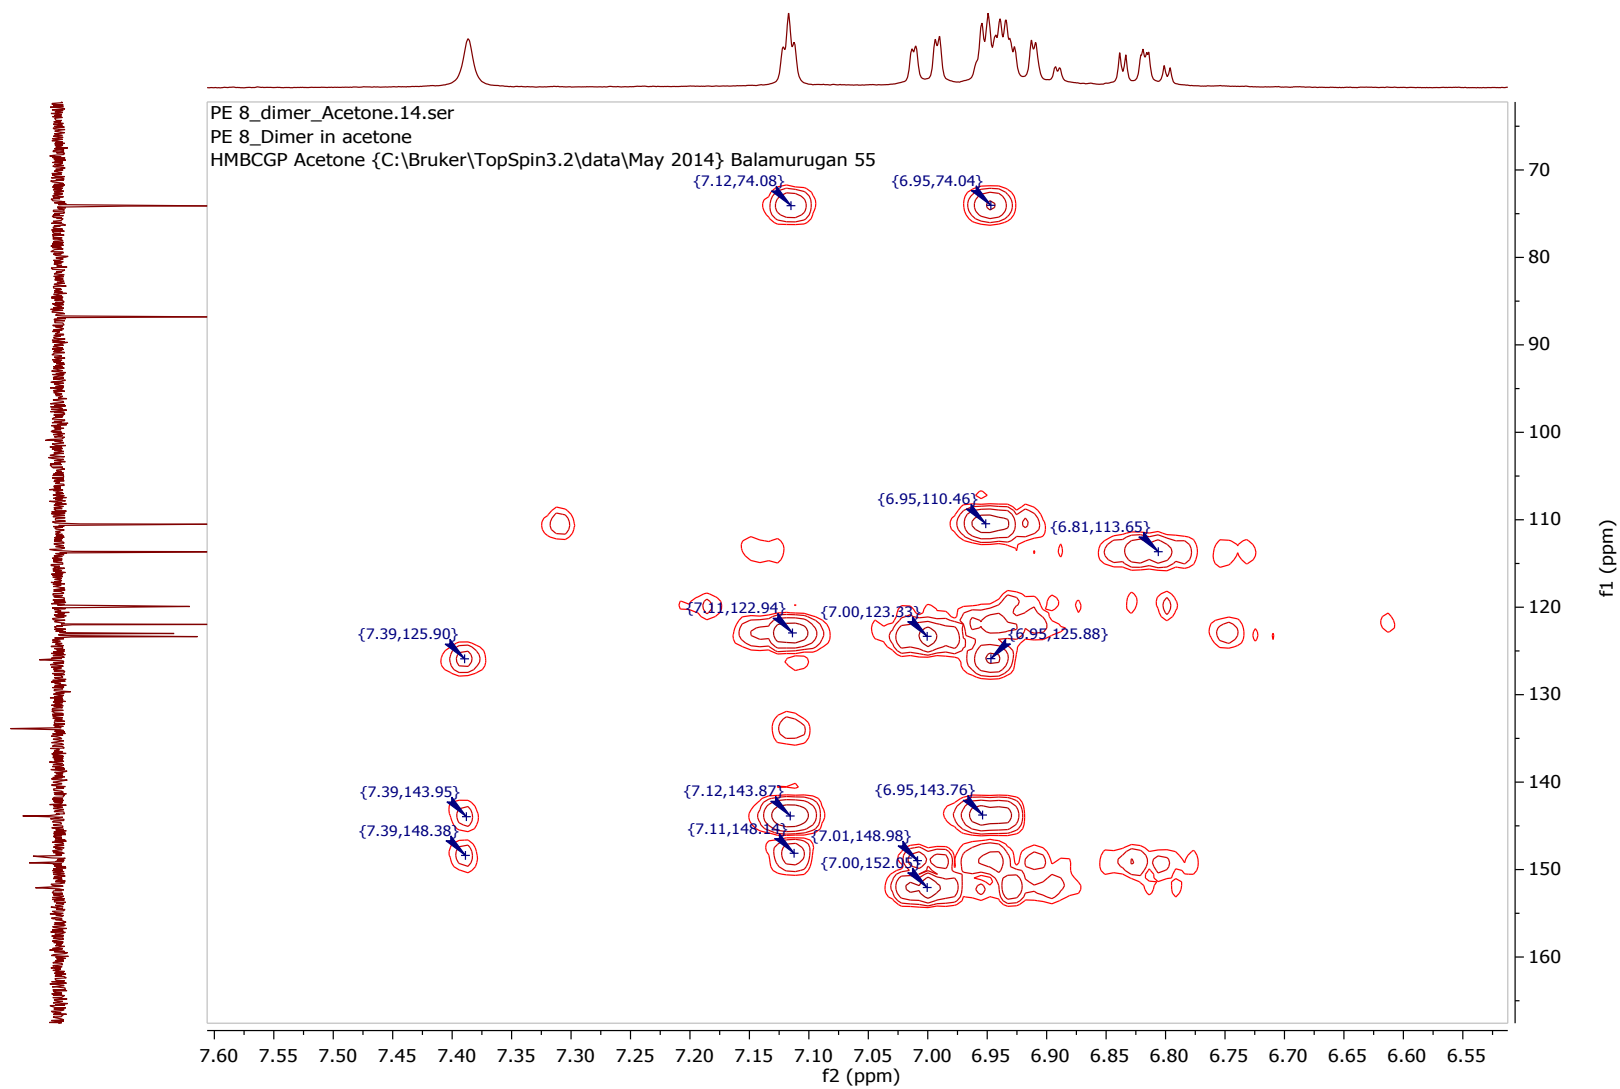

Fig. S12a. HMBC NMR spectrum of **3B**. Correlations in the aromatic region are shown.



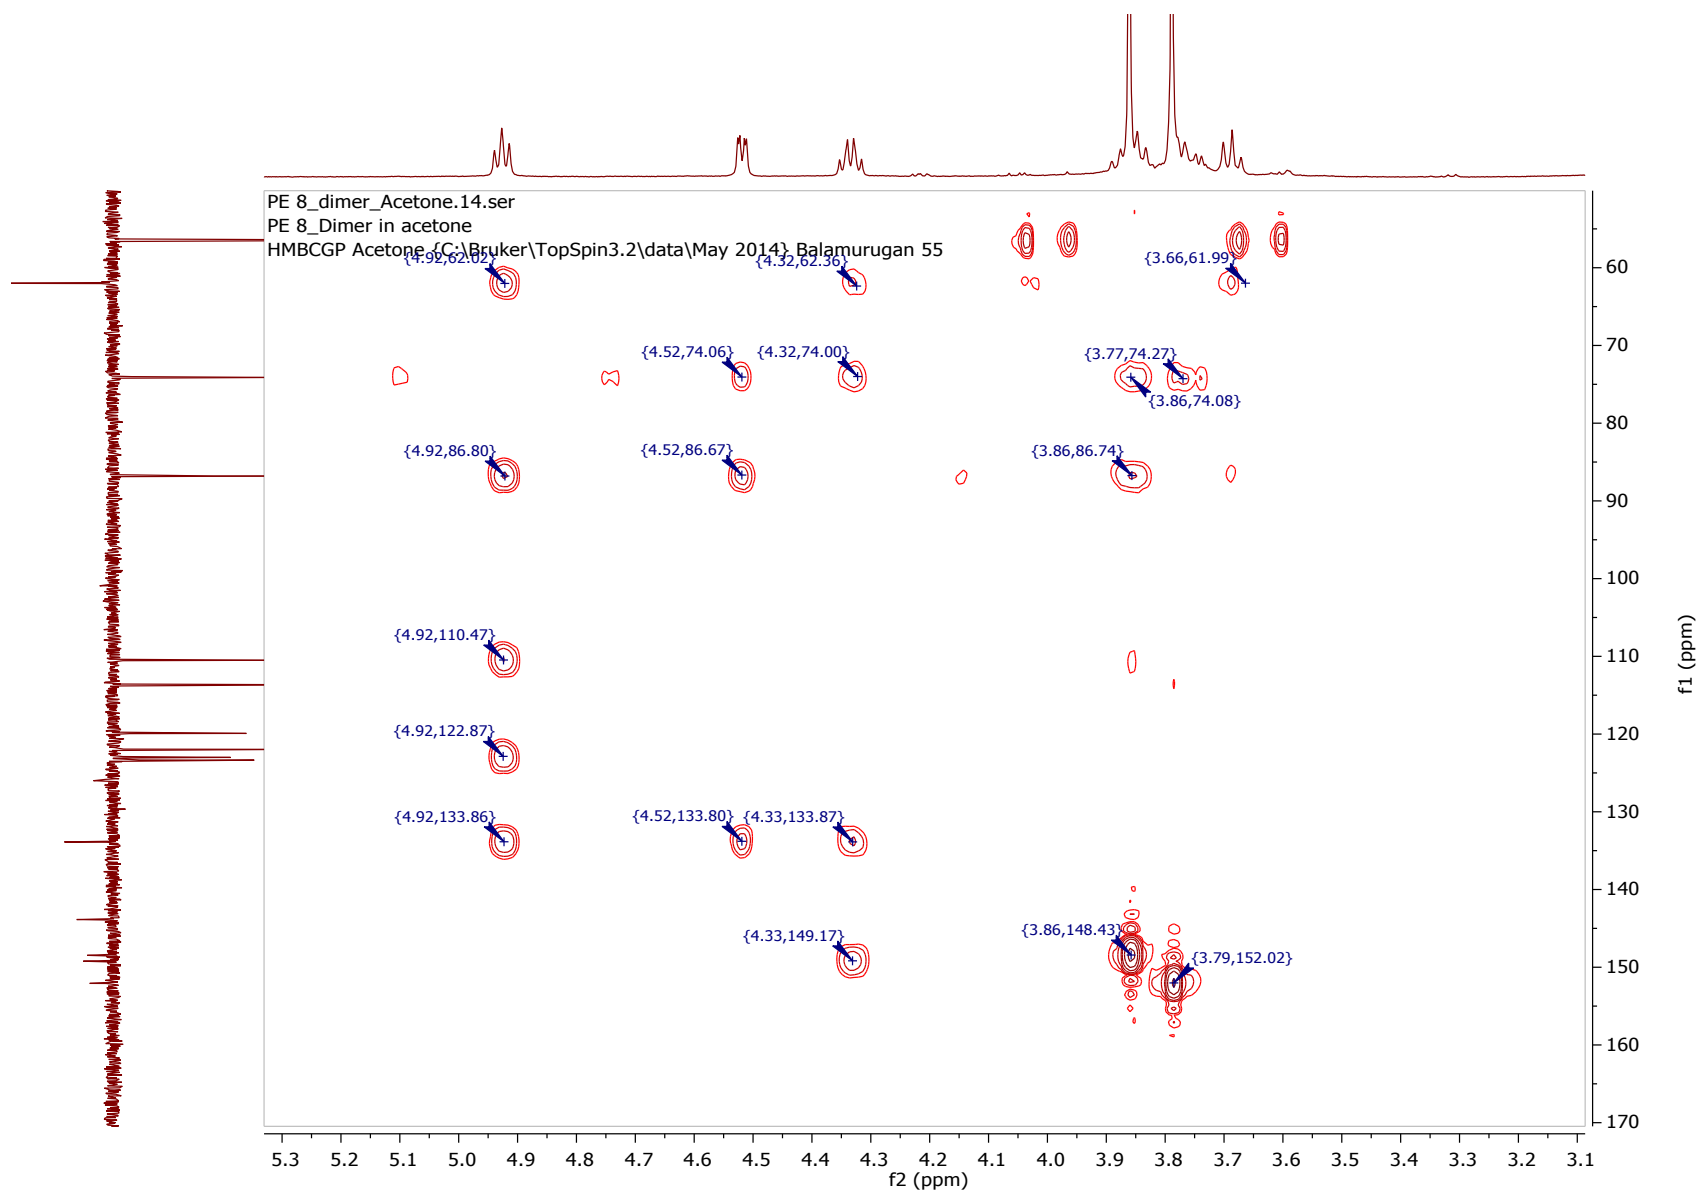

**Fig. S12b.** HMBC NMR spectrum of **3B**. Correlations in the aliphatic region are shown.

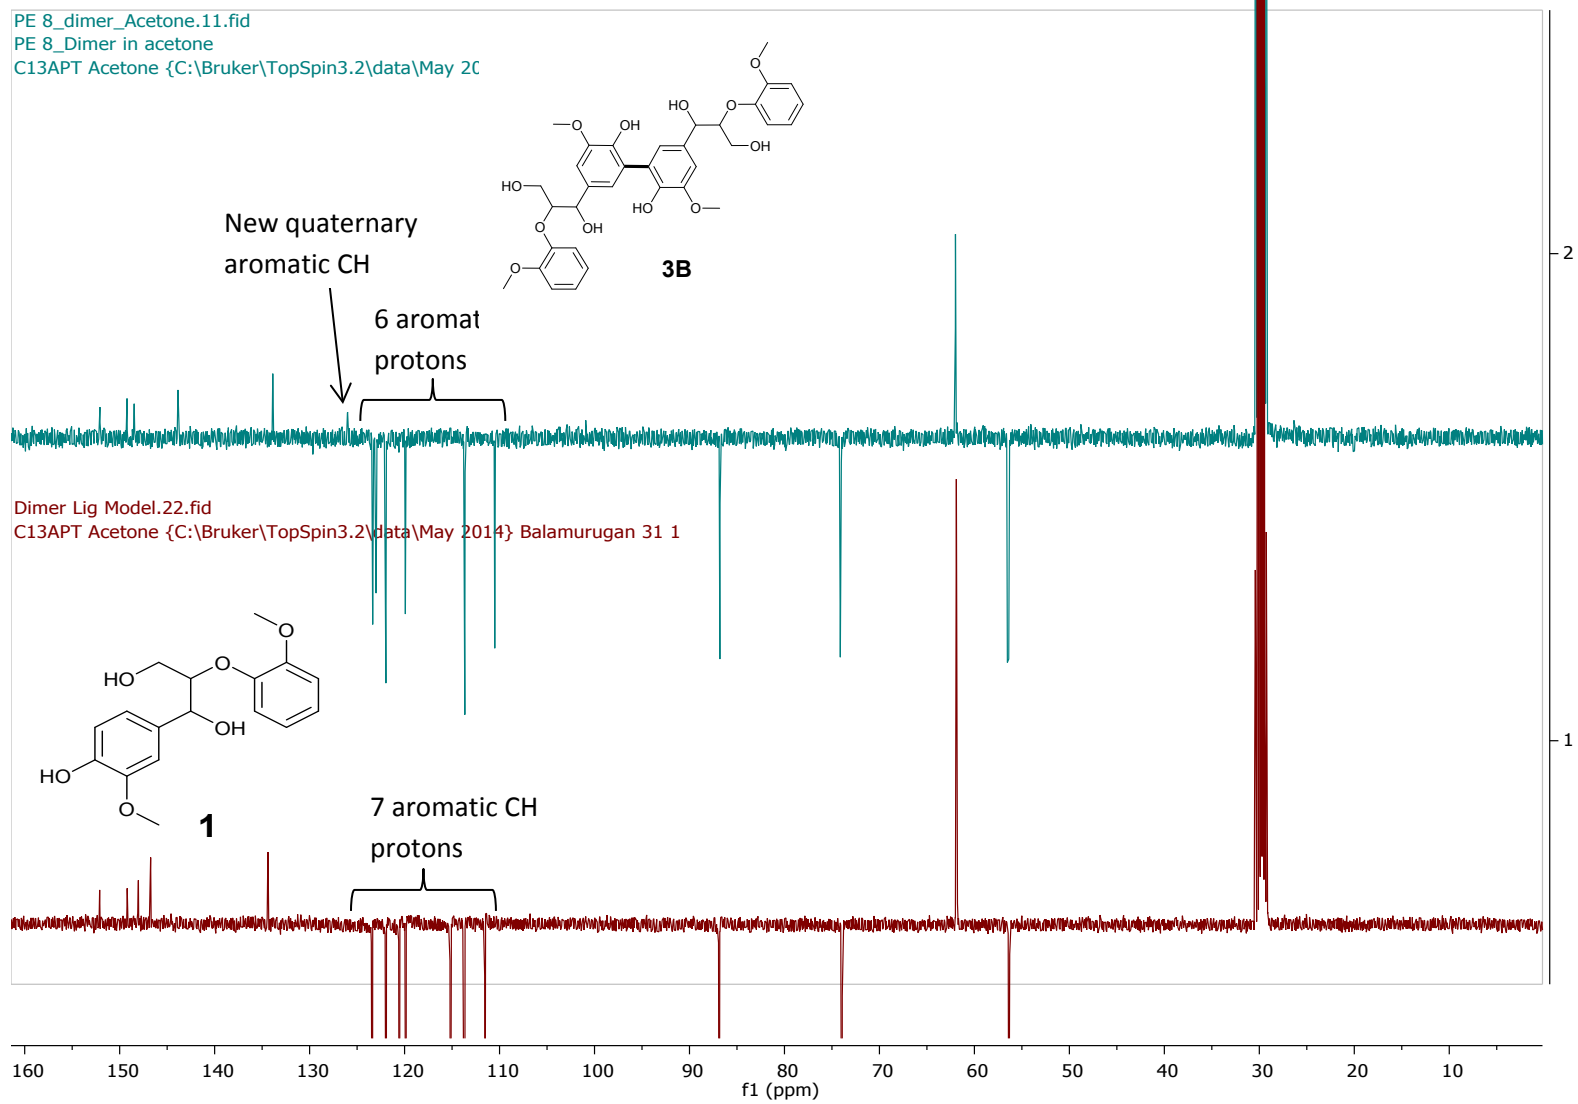

Fig. S13. Comparison of  $^{13}\text{C}$  APT spectra of **1** and **3B**.
